# Supplementary material for: Dynamic linear models guide design and analysis of microbiota studies within artificial human guts
Source: PubMed Central journal article supplement (PMC6233358; doi:10.1186/s40168-018-0584-3), 2018-11-12

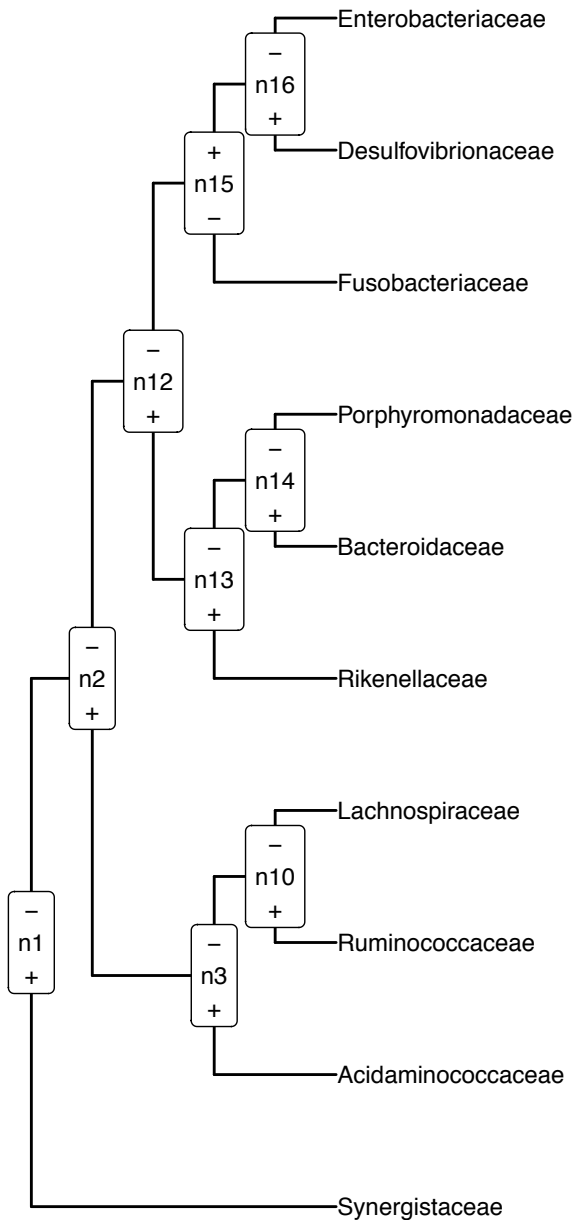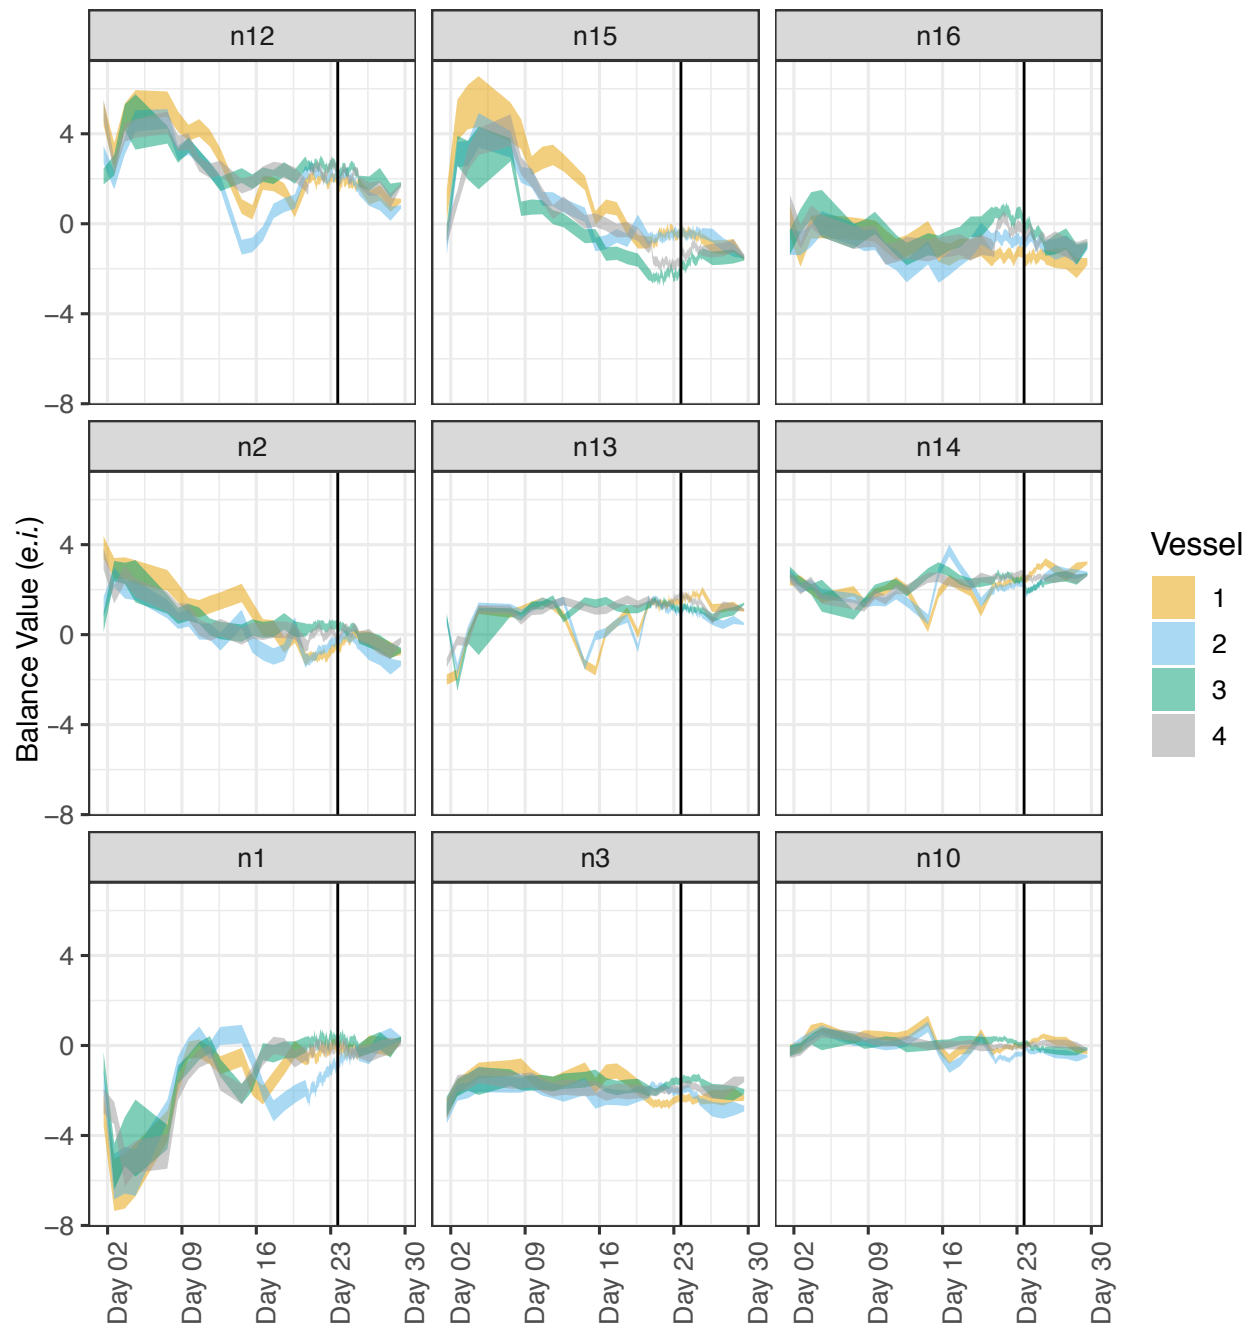

Supplement: 40168_2018_584_MOESM7_ESM.pdf [file 40168_2018_584_MOESM7_ESM.pdf]
